# Supplementary material for: Statistic and Network Features of RGB and Hyperspectral Imaging for Determination of Black Root Mold Infection in Apples
Source: MDPI journal article supplement (doi:10.3390/foods12081608), 2023-04-10
Supplement: s1 [file s1]

Supplementary Material

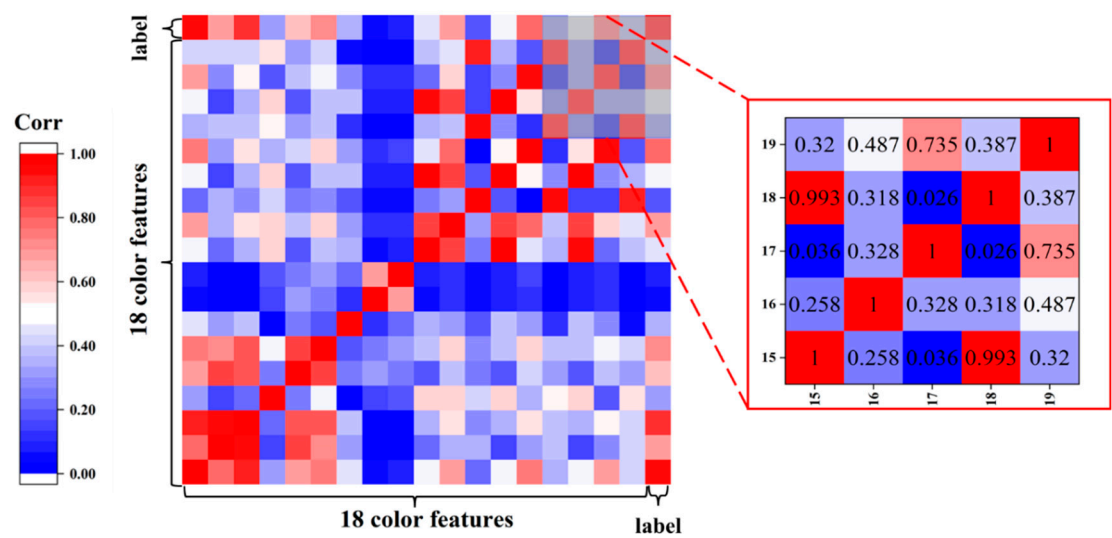

Figure S1. Pearson correlation analysis of 18 color features.

Table S1. RGB and HIS Imaging system to capture apple data.

| Degree       | Heathy | Mildly infected | Moderately infected | Severely infected |
|--------------|--------|-----------------|---------------------|-------------------|
| Number (RGB) | 52     | 62              | 61                  | 55                |
| Number (HSI) | 52     | 62              | 61                  | 55                |
